# Supplementary material for: Resistance, Recovery and Resilience of Two Co-Occurring Palaeotropical Pinus Species Differing in the Sizes of Their Distribution Areas
Source: MDPI journal article supplement (doi:10.3390/f12040511), 2021-04-20
Supplement: s1 [file s1]

## Supplementary Material

### Resistance, recovery and resilience of two co-occurring palaeotropical *Pinus* species differing in the sizes of their distribution areas

Le T. Ho, Jana Hoppe and Frank M. Thomas

Table S1. Soil chemical properties of the plots with different *Pinus* species. *PIKE*: *Pinus kesiya*; *PIDA*: *Pinus dalatensis*.

| Species                  | Soil chemical properties |             |             |                                       |                                          |                                                       |                                           |
|--------------------------|--------------------------|-------------|-------------|---------------------------------------|------------------------------------------|-------------------------------------------------------|-------------------------------------------|
|                          | pH <sub>H2O</sub>        | Total C (%) | Total N (%) | P <sub>a</sub> (mg kg <sup>-1</sup> ) | Al (mmol <sub>c</sub> kg <sup>-1</sup> ) | Neutral cations (mmol <sub>c</sub> kg <sup>-1</sup> ) | CEC (mmol <sub>c</sub> kg <sup>-1</sup> ) |
| <i>PIKE</i>              | 4.5                      | 6.4 ± 0.4   | 0.23 ± 0.02 | 1.6 ± 0.1                             | 308.3 ± 26.6                             | 6.0 ± 1.0                                             | 314.4 ± 26.0                              |
| <i>PIDA</i> <sub>1</sub> | 3.9                      | 3.2 ± 0.2   | 0.17 ± 0.01 | 3.0 ± 0.8                             | 313.5 ± 45.1                             | 3.1 ± 0.2                                             | 316.6 ± 45.0                              |
| <i>PIDA</i> <sub>2</sub> | 3.9                      | 5.4 ± 0.5   | 0.26 ± 0.02 | 2.3 ± 0.4                             | 66.4 ± 6.4                               | 2.2 ± 0.2                                             | 68.6 ± 6.4                                |
| <i>PIDA</i> <sub>3</sub> | 3.8                      | 4.7 ± 0.1   | 0.33 ± 0.01 | 4.7 ± 0.5                             | 292.5 ± 16.8                             | 3.7 ± 0.2                                             | 296.3 ± 17.0                              |
| <i>PIDA</i> <sub>4</sub> | 4.0                      | 4.1 ± 0.5   | 0.24 ± 0.02 | 1.1 ± 0.1                             | 104.5 ± 11.5                             | 4.0 ± 0.8                                             | 108.9 ± 11.9                              |

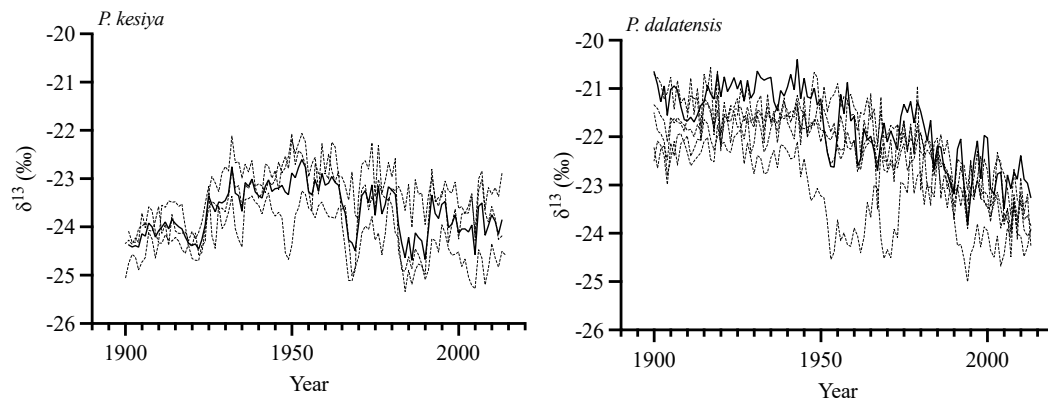

Figure S1. Chronologies of tree-ring stable carbon isotopes ( $\delta^{13}\text{C}$ ) of two pine species. *Dashed lines* mean individual  $\delta^{13}\text{C}$  time series; *solid lines* mean  $\delta^{13}\text{C}$  time series.

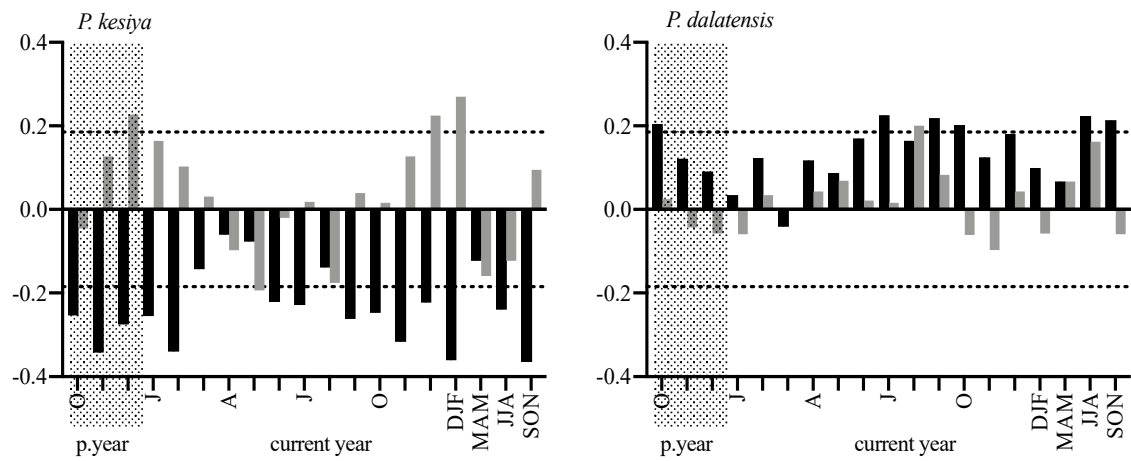

Figure S2. Correlation coefficients of  $^{13}\text{C}$  discrimination against atmospheric  $\text{CO}_2$  ( $\Delta^{13}\text{C}$ ) of the two pine species with *temperature* (black bars) and *precipitation* (grey bars) from 1901 to 2013. Dotted lines indicate thresholds of significance at  $P < 0.05$ . The letters on the x-axis indicate calendar months and seasonal periods. *DJF*: December (preceding year) to February; *MAM*: March to May; *JJA*: June to August; *SON*: September to November.
